# Supplementary material for: Deficiency of Caspase-1 Attenuates HIV-1-Associated Atherogenesis in Mice
Source: MDPI journal article supplement (doi:10.3390/ijms241612871), 2023-08-17
Supplement: s1 [file s1]

## *Supplementary Material*

# Deficiency of Caspase-1 Attenuates HIV-1-Associated Atherogenesis in Mice

Mohammad Afaque Alam <sup>1,2,†</sup>, Maurizio Caocci <sup>3,†</sup>, Mi Ren <sup>1,2</sup>, Zheng Chen <sup>1,2</sup>, Fengming Liu <sup>1,2</sup>, Mst Shamima Khatun <sup>4</sup>, Jay K. Kolls <sup>4,5</sup>, Xuebin Qin <sup>1,2,\*</sup> and Tricia H. Burdo <sup>3,\*</sup>

- <sup>1</sup> Department of Comparative Pathology, Tulane National Primate Research Center, Tulane University School of Medicine, Tulane University, 18703 Three Rivers Road, Covington, LA 70433, USA;  
malam1@tulane.edu (M.A.A.); mrem@tulane.edu (M.R.); zchen29@tulane.edu (Z.C.); liufengming329@gmail.com (F.L.)
- <sup>2</sup> Department of Microbiology and Immunology, School of Medicine, Tulane University, New Orleans, LA 70112, USA
- <sup>3</sup> Department of Microbiology, Immunology and Inflammation, Center for NeuroVirology and Gene Editing, Lewis Katz School of Medicine, Temple University, Philadelphia, PA 19140, USA; tuh20265@temple.edu
- <sup>4</sup> Departments of Pediatrics & Medicine, Center for Translational Research in Infection and Inflammation, Tulane University School of Medicine, New Orleans, LA 70112, USA; mkhatun@tulane.edu (M.S.K.); jkolls1@tulane.edu (J.K.K.)
- <sup>5</sup> Department of Medicine, Section of Pulmonary Diseases, Critical Care and Environmental Medicine, Tulane University School of Medicine, New Orleans, LA 70112, USA
- \* Correspondence: xqin2@tulane.edu (X.Q.); burdot@temple.edu (T.H.B.); Tel.: +1-215-707-1618 (T.H.B.)
- † These authors contributed equally to this work.

**Table S1.** Antibodies and reagents.

| <b>Antibodies and reagents</b>      | <b>Company</b>             | <b>Cat. No.</b> |
|-------------------------------------|----------------------------|-----------------|
| Anti-Mouse CD11b PE-Cyanine7, M1/70 | eBioscience                | 25-0112-81      |
| APC anti-mouse Ly-6G Antibody       | Biolegend                  | 127613          |
| Anti-Mouse Ly-6C eFluor® 450        | eBioscience                | 48-5932-80      |
| FAM-FLICA                           | Immunochemistry Technology | 97              |
| Propidium Iodide                    | Immunochemistry Technology | 638             |
| CD68 antibody                       | Invitrogen                 | 14-0681-82      |
| CD3 Antibody (PC3/188A) FITC        | Santa Cruz Biotechnology   | sc-20047 FITC   |
| CD163 antibody [EPR19518]           | abcam                      | ab182422        |
| M-CSF                               | Millipore Sigma            | M6518-10UG      |
| OxLDL                               | Kalen biomedical, LLC      | 770202-4        |
| DAPI Solution                       | Thermo Scientific          | 62248           |
| Caspase-1 (M-19)                    | Santa Cruz Biotechnology   | sc-1218R        |
| Goat anti-rat-IgG                   | Invitrogen                 | A-11006         |
| Goat anti-rabbit-HRP                | DAKO                       | P0448           |

Abbreviations: FAM-FLICA: Fluorescein amidites-labeled inhibitors of caspase; M-CSF: Macrophage colony-stimulating factor; oxLDL: oxidized low-density-lipoproteins; HRP: horseradish peroxidase.

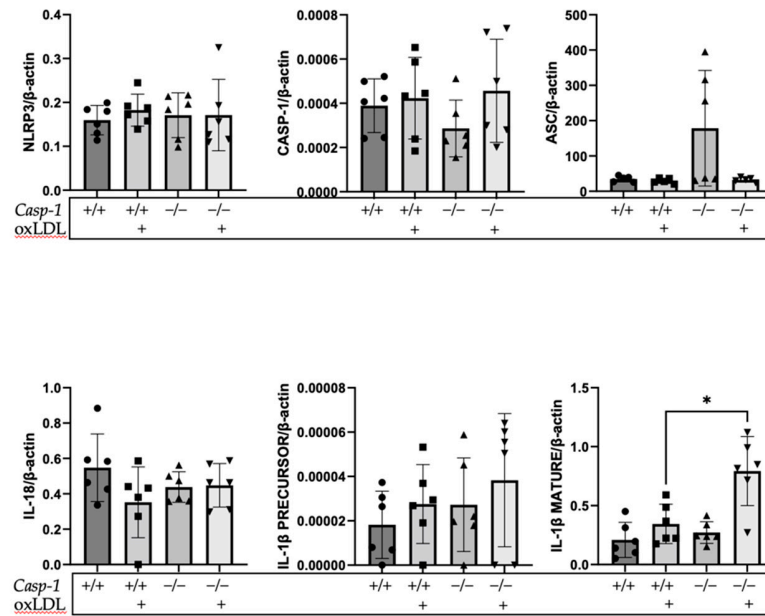

**Figure S1.** NLRP3 inflammasome pathway activation in MDMs from spleen of *Tg26*<sup>+/-</sup>/*ApoE*<sup>-/-</sup>/*Casp-1*<sup>+/+</sup> and *Tg26*<sup>+/-</sup>/*ApoE*<sup>-/-</sup>/*Casp-1*<sup>-/-</sup> mice after 12 weeks of an atherogenic diet. Monocyte-derived macrophages (MDM) cells isolated from spleens of caspase-1 sufficient and caspase-1 deficient mice, were cultured for 8 days and incubated with/without oxLDL (100 μg/mL) for 24 hours. mRNA levels were analyzed by RT-qPCR, normalized to β-actin, and compared between groups. Levels between all groups were analyzed using one-way ANOVA, and post-hoc t-tests were used. \*p<0.05

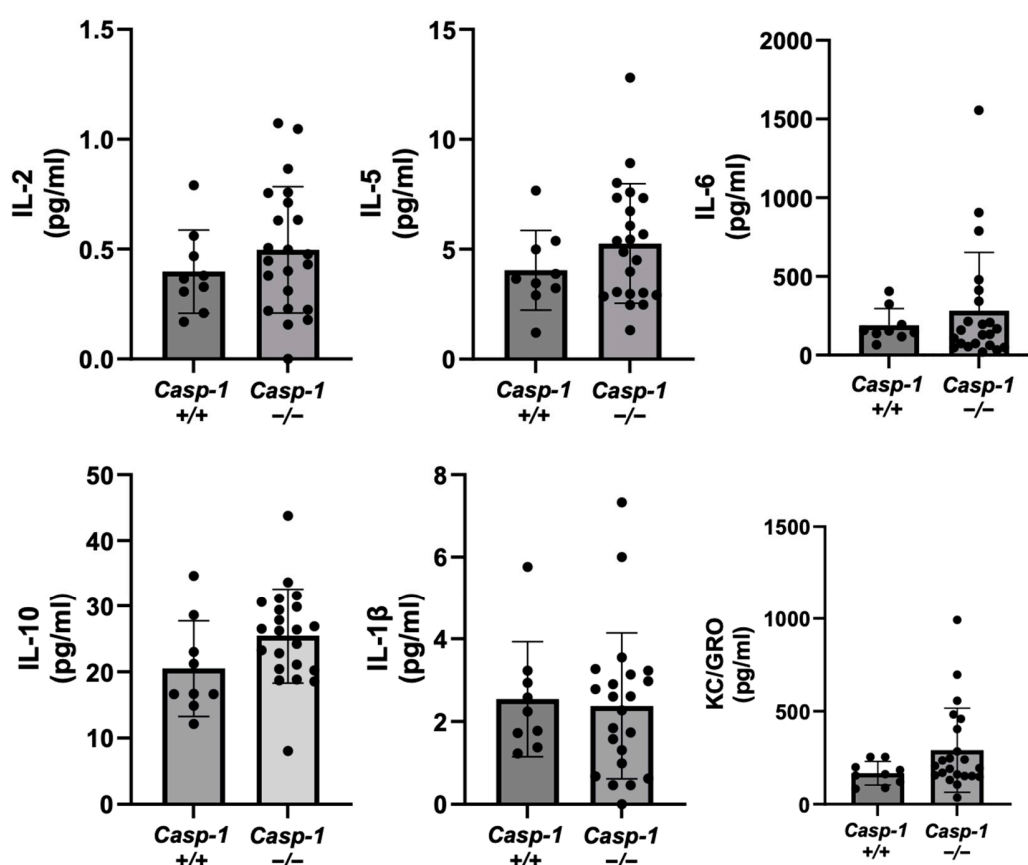

**Figure S2.** Proinflammatory cytokines detected serum from *Tg26*<sup>+/-</sup>/*ApoE*<sup>-/-</sup>/*Casp-1*<sup>+/+</sup> and *Tg26*<sup>+/-</sup>/*ApoE*<sup>-/-</sup>/*Casp-1*<sup>-/-</sup> mice on 12 weeks of an atherogenic diet. Serum from the *Tg26*<sup>+/-</sup>/*ApoE*<sup>-/-</sup>/*Casp-1*<sup>+/+</sup> (*Casp-1*<sup>+/+</sup>) and *Tg26*<sup>+/-</sup>/*ApoE*<sup>-/-</sup>/*Casp-1*<sup>-/-</sup> (*Casp-1*<sup>-/-</sup>) was analyzed for different proinflammatory cytokines. Data were analyzed by two-tailed t-tests.
